# Supplementary material
Source: PubMed Central journal article supplement (PMC8941348)
Supplement: jama-e220992-s003.pdf [file jama-e220992-s003.pdf]

## Supplemental Online Content

Shah R, Dai DWT, Alsweiler JM, et al; Children With Hypoglycaemia and Their Later Development (CHYLD) Study Team. Association of neonatal hypoglycemia with academic performance in mid-childhood. *JAMA*. Published March 22, 2022.  
doi:10.1001/jama.2022.0992

**eTable 1.** Assessments and Secondary Outcomes in the CHYLD Mid-Childhood Outcome Study

**eTable 2.** Characteristics of Children Who Did and Did Not Participate in the CHYLD Mid-Childhood Outcome Study

**eTable 3.** Neonatal Hypoglycaemic Episodes vs. No Hypoglycemic Episodes and Primary and Critical Secondary Outcomes at Mid-Childhood

**eTable 4.** Undetected vs. Detected Neonatal Hypoglycemia and Primary and Critical Secondary Outcomes at Mid-Childhood

**eTable 5.** Different Degrees of Neonatal Hypoglycemia and Primary and Critical Secondary Outcomes in Mid-Childhood

**eTable 6A.** Sensitivity Analysis of Primary and Critical Secondary Outcomes in Mid-Childhood, Excluding Children Who Experienced a Postnatal Neurological Insult

**eTable 6B.** Sensitivity Analysis of Primary and Critical Secondary Outcomes in Mid-Childhood, Excluding Children Who Were Educated Outside of New Zealand

**eTable 6C.** Sensitivity Analysis of Primary and Critical Secondary Outcomes in Mid-Childhood, Excluding Children Who Were Classified as Normoglycemic But Did Not Have Neonatal Continuous Glucose Monitoring to Potentially Detect Low Sensor Glucose Concentrations

**eTable 6D.** Sensitivity Analysis of Primary and Critical Secondary Outcomes in Mid-Childhood, Excluding Children Who Were Born at <35 Weeks' Gestation

**eTable 7.** Neonatal Hypoglycemia and Primary Outcome, Executive Function and Visual-Motor Integration at Mid-Childhood, Adjusted for Neurocognitive Function at 4.5 Years (Exploratory Post Hoc Analysis)

### eReferences

This supplemental material has been provided by the authors to give readers additional information about their work.

**eTable 1. Assessments and Secondary Outcomes in the CHYLD Mid-Childhood Outcome Study**

| <b>Domain</b>      | <b>Test</b>                                                    | <b>Subtest</b>                   | <b>Skill or function</b>     | <b>Prespecified outcome</b>                                                                                                                                                         | <b>Values and interpretation</b>                                                                                                        | <b>Minimum clinically important difference (continuous data)</b>                        |
|--------------------|----------------------------------------------------------------|----------------------------------|------------------------------|-------------------------------------------------------------------------------------------------------------------------------------------------------------------------------------|-----------------------------------------------------------------------------------------------------------------------------------------|-----------------------------------------------------------------------------------------|
| Executive function | Cambridge Neuropsychological Test Automated Battery (CANTAB)** | Attention Switching Task         | Attention                    | 1. Switching median response latency (ms)<br>2. Congruent median response latency (ms)                                                                                              | Shorter latency indicates better attention                                                                                              | 0.3 SD                                                                                  |
|                    |                                                                | One-touch Stockings of Cambridge | Working memory and planning  | 3. Number of problems solved on first choice<br>4. Median latency to first choice (ms)                                                                                              | Greater number of problems solved (maximum 20) and shorter latency indicate better working memory and planning                          | Count ratio 0.8 or 1.20 (problems)<br>0.3 SD (latency)                                  |
|                    |                                                                | Spatial Working Memory           |                              | 5. Between search errors (number of times the subject revisited a box in which a token had previously been found, sum of trials of four, six and eight tokens)<br>6. Strategy score | Fewer search errors and higher strategy score indicate better special working memory                                                    | Count ratio 0.8 or 1.20 (errors)<br>0.3 SD (strategy score)                             |
|                    |                                                                | Paired Associate Learning        | Visual memory                | 7. First attempt memory score (number of correct choices made on the first attempt during assessment problems)<br>8. Total errors (adjusted)                                        | Higher memory score and fewer errors indicate better visual memory                                                                      | 0.3 SD (memory score)<br>Count ratio 0.8 or 1.20 (errors)                               |
|                    |                                                                | Stop Signal Task                 | Inhibition (impulse control) | 9. Mean reaction time (length of time between the go stimulus and the stop stimulus at which the child was able to successfully inhibit their response on 50% of the trials, ms)    | Shorter reaction time indicates better impulse control; typical mean (SD) reaction time in 9-year-old children 301 (96) ms <sup>1</sup> | 0.3 SD (reaction time)<br>Risk ratio 0.8 or 1.20 (reaction time less than go/increases) |

|                                            |                                                                                                   |                       |                                                                            |                                                                                                                                                                                                                                                      |                                                                                                               |                    |
|--------------------------------------------|---------------------------------------------------------------------------------------------------|-----------------------|----------------------------------------------------------------------------|------------------------------------------------------------------------------------------------------------------------------------------------------------------------------------------------------------------------------------------------------|---------------------------------------------------------------------------------------------------------------|--------------------|
|                                            |                                                                                                   |                       |                                                                            | 10. Proportion with failed stop reaction time less than go reaction time<br>11. Failed stop reaction time increases                                                                                                                                  |                                                                                                               |                    |
|                                            | Behavior Rating Inventory of Executive Function (BRIEF)                                           | Parent questionnaire  | Behavioural manifestations of executive function in the home environment   | 12. T-scores for Behavioral Regulation<br>13. T-scores for Metacognition<br>14. T-scores for Global Executive Composite                                                                                                                              | Higher T-scores indicate a higher level of dysfunction; normative mean (SD) 50 (10), 95% range 30 to 70       | 3 (T-score)        |
|                                            |                                                                                                   | Teacher questionnaire | Behavioural manifestations of executive function in the school environment | 15. T-scores for Behavioral Regulation<br>16. T-scores for Metacognition<br>17. T-scores for Global Executive Composite<br>18. Proportion of children with Global Executive Composite in the clinical range (>65) on either parent or teacher report | Higher T-scores indicate a higher level of dysfunction; normative mean (SD) 50 (10), 95% range 30 to 70       | 3 (T-score)        |
| Motor                                      | Movement Assessment Battery for Children, 2 <sup>nd</sup> edition (MABC-2)                        |                       | Fine motor skills                                                          | 19. Fine motor scale score<br>20. Proportion of children at risk ( $\leq 15^{\text{th}}$ percentile)<br>21. Proportion of children with significant ( $\leq 5^{\text{th}}$ percentile) motor difficulty                                              | Lower motor scale score indicates worse fine motor control; normative mean (SD) 10 (3), 95% range 4 to 16     | 1 (scale score)    |
| Motor and visual perception and processing | Beery-Buktenica Developmental Test of Visual Motor Integration, 6 <sup>th</sup> edition (BBVMI-6) |                       | Integration of visual and motor skills, visual perception and coordination | 22. Motor coordination standard score<br>23. Visual perception standard score<br>24. Visual motor integration standard scores<br>25. Proportion of children with visual motor integration impairment (<85)                                           | Lower standard scores indicate worse visual motor function; normative mean (SD) 100 (15), 95% range 70 to 130 | 5 (standard score) |

|                      |                                                           |  |                                                                                               |                                                                                                                                                                                                                                                                                                                                                                                                                            |                                                                                                                                                                                     |               |
|----------------------|-----------------------------------------------------------|--|-----------------------------------------------------------------------------------------------|----------------------------------------------------------------------------------------------------------------------------------------------------------------------------------------------------------------------------------------------------------------------------------------------------------------------------------------------------------------------------------------------------------------------------|-------------------------------------------------------------------------------------------------------------------------------------------------------------------------------------|---------------|
|                      | Laptop based tests of motion coherence and form coherence |  | Function of the dorsal visual cortical stream                                                 | 26. Motion coherence threshold<br>27. Form coherence threshold<br>28. Difference between form and motion coherence thresholds                                                                                                                                                                                                                                                                                              | Lower coherence threshold indicates better visual perception; coherence threshold is a percentage with potential range 1 to 100 (mean threshold in normal adults is 6) <sup>2</sup> | 0.3 SD        |
| Academic achievement | Computer based school achievement tests (e-asTTle)        |  | Reading Comprehension and Mathematics (English Curriculum); Pānui and Pāngarau (Māori medium) | 29. e-asTTle z-score for year and term of school in Reading Comprehension/Pānui<br>30. e-asTTle z-score for year and term of school in Mathematics/Pāngarau<br>31. Low reading achievement: e-asTTle score below or well below the normative curriculum level in Reading Comprehension/Pānui<br>32. Low mathematics achievement: e-asTTle score below or well below the normative curriculum level in Mathematics/Pāngarau | Lower z-score indicates worse educational achievement; normative mean (SD) 0.0 (1.0), 95% range - 2.0 to 2.0                                                                        | 0.3 (z-score) |
|                      | Teacher questionnaire                                     |  | Teacher report of academic performance                                                        | 33. Teacher report (global judgement) of low academic achievement in reading, relative to peers (much worse or worse than peers) and expected curriculum level (well below or below expected level)<br>34. Teacher report (global judgement) of low academic achievement in mathematics relative to peers (much worse or worse                                                                                             |                                                                                                                                                                                     |               |

|                                         |                                                |                               |                                                                                                           |                                                                                                                                                                                                                                                                                                                                                                                                                                                                                                                                                                                                                                                    |                                                                                                                                                                                               |                                    |                                     |
|-----------------------------------------|------------------------------------------------|-------------------------------|-----------------------------------------------------------------------------------------------------------|----------------------------------------------------------------------------------------------------------------------------------------------------------------------------------------------------------------------------------------------------------------------------------------------------------------------------------------------------------------------------------------------------------------------------------------------------------------------------------------------------------------------------------------------------------------------------------------------------------------------------------------------------|-----------------------------------------------------------------------------------------------------------------------------------------------------------------------------------------------|------------------------------------|-------------------------------------|
|                                         |                                                |                               |                                                                                                           | <p>than peers) and expected curriculum level (well below or below expected level)</p> <p>35. Teacher report (global judgement) of low academic achievement in writing relative to peers (much worse or worse than peers) and expected curriculum level (well below or below expected level)</p> <p>36. Need for additional learning support or older than expected for year level</p> <p>37. Need for additional learning support or older than expected for year level or low educational achievement, defined as an e-asTTle score below or well below the normative curriculum level in Reading Comprehension/Pānui or Mathematics/Pāngarau</p> |                                                                                                                                                                                               |                                    |                                     |
| Social-emotional and adaptive behaviour | Strengths and Difficulties Questionnaire (SDQ) | Parent questionnaire (SDQ-P)  | Emotional symptoms, conduct problems, hyperactivity/inattention, peer relationships, pro-social behaviour | 38. SDQ-P Total Difficulties Score                                                                                                                                                                                                                                                                                                                                                                                                                                                                                                                                                                                                                 | Higher Total Difficulties Score indicates worse emotional and behavioral regulation; boys have an expected mean (SD) of 8.3 (7.1) and girls of 5.3 (5.7), possible range 0 to 40 <sup>3</sup> | 0.3 SD                             |                                     |
|                                         |                                                | Teacher questionnaire (SDQ-T) |                                                                                                           | 39. SDQ_P Prosocial Behaviour Score                                                                                                                                                                                                                                                                                                                                                                                                                                                                                                                                                                                                                |                                                                                                                                                                                               | 40. SDQ-T Total Difficulties Score | 41. SDQ_T Prosocial Behaviour Score |

|                |                                  |                      |                                                                         |                                                                                                                   |                                                                                                                                                                              |        |
|----------------|----------------------------------|----------------------|-------------------------------------------------------------------------|-------------------------------------------------------------------------------------------------------------------|------------------------------------------------------------------------------------------------------------------------------------------------------------------------------|--------|
|                |                                  |                      |                                                                         | borderline or abnormal Prosocial Behaviour Scores on either SDQ questionnaire (SDQ-P or SDQ-T subscale $\leq 5$ ) | of 7.4 (2.5) and girls of 8.5 (2.0), possible range 0 to 10 <sup>3</sup>                                                                                                     |        |
|                | Autistic Spectrum Quotient (AQ)  | Parent questionnaire | Autistic spectrum disorder traits                                       | 44. AQ Total Score<br>45. Proportion of children in clinical range ( $>75$ )                                      | Higher Total Score indicates greater autistic traits; test range 0 to 150; typical mean (SD) in 4- to 11-year-old children 41.7 (18.6), possible range 0 to 150 <sup>4</sup> | 0.3 SD |
| General health | Child Health Questionnaire (CHQ) | Parent questionnaire | General health, behaviour, limitation in everyday and school activities | 46. Physical functioning scaled score<br>47. Psychosocial scaled score                                            | Higher scaled score indicates better functioning; normative mean (SD) 50 (10), 95% range 30 to 70                                                                            | 3      |

\* Prespecified in Statistical Analysis Plan, version 1.5, 22 June 2020. SD, standard deviation. \*\*Normative data were not available for children; typical mean (SD) are provided where available.

**eTable 2. Characteristics of Children Who Did and Did Not Participate in the CHYLD Mid-Childhood Outcome Study**

|                                          | Assessed    | N   | Not Assessed | N   |
|------------------------------------------|-------------|-----|--------------|-----|
| <b>Maternal characteristics</b>          |             |     |              |     |
| Age at entry—y                           | 30.3 (6.3)  | 466 | 29.0 (6.6)   | 100 |
| BMI in early pregnancy—kg/m <sup>2</sup> | 28.8 (7.3)  | 466 | 27.5 (6.1)   | 100 |
| Diabetes in pregnancy                    |             | 466 |              | 100 |
| None                                     | 274 (61%)   |     | 58 (58%)     |     |
| Gestational                              | 138 (31%)   |     | 33 (33%)     |     |
| Pre-gestational                          | 34 (7%)     |     | 9 (9%)       |     |
| Smoking in pregnancy                     | 130 (31%)   | 418 | 14 (27%)     | 51  |
| Alcohol use in pregnancy                 | 58 (14%)    | 413 | 7 (13%)      | 53  |
| Highest education level                  |             | 371 |              | 41  |
| Schooling incomplete                     | 32 (9%)     |     | 7 (17%)      |     |
| High school ≥3 y                         | 83 (22%)    |     | 5 (12%)      |     |
| Technical or trade                       | 132 (36%)   |     | 16 (39%)     |     |
| University                               | 124 (33%)   |     | 13 (32%)     |     |
| <b>Neonatal characteristics</b>          |             |     |              |     |
| Primary risk factor for hypoglycemia     |             | 480 |              | 107 |
| IDM                                      | 175 (36%)   |     | 42 (39%)     |     |
| Preterm                                  | 170 (35%)   |     | 40 (37%)     |     |
| Small                                    | 71 (15%)    |     | 14 (13%)     |     |
| Large                                    | 47 (10%)    |     | 6 (6%)       |     |
| Other                                    | 17 (4%)     |     | 5 (5%)       |     |
| Sex—female                               | 230 (48%)   | 480 | 49 (46%)     | 107 |
| Twins                                    | 67 (14%)    | 480 | 16 (15%)     | 107 |
| Gestational length—week                  | 37.3 (2.1)  | 480 | 37.4 (1.9)   | 107 |
| Birthweight—g                            | 3005 (878)  | 480 | 3023 (852)   | 107 |
| Birth weight z-score                     | 0.09 (1.65) | 480 | 0.07 (1.7)   | 107 |
| Apgar <7 at 5 minutes                    | 10 (2%)     | 480 | 1 (1%)       | 107 |
| Admitted to NICU                         | 239 (50%)   | 480 | 42 (39%)*    | 107 |
| Prioritized ethnicity                    |             | 472 | *            | 101 |
| Māori                                    | 149 (32%)   |     | 25 (25%)     |     |
| Pacific                                  | 9 (2%)      |     | 4 (4%)       |     |

|                                                                       |                       |     |                       |     |
|-----------------------------------------------------------------------|-----------------------|-----|-----------------------|-----|
| Other<br>NZ European                                                  | 22 (5%)<br>292 (61%)  |     | 14 (14%)<br>58 (57%)  |     |
| Socio-economic status                                                 |                       | 479 |                       | 107 |
| Most deprived <sup>b</sup>                                            | 192 (40%)             |     | 51 (48%)              |     |
| Less deprived                                                         | 287 (60%)             |     | 56 (52%)              |     |
| <b>Neonatal glycemia</b>                                              |                       | 480 |                       | 107 |
| BGC—mmol/L [range]                                                    |                       |     |                       |     |
| <12 h                                                                 | 3.3 (0.7) [0.0, 8.5]  |     | 3.4 (90.7) [0.0, 7.4] |     |
| 12 to <24 h                                                           | 3.7 (0.7) [0.8, 9.8]  |     | 3.7 (0.7) [2.0, 7.5]  |     |
| 24 to <48 h                                                           | 3.8 (0.8) [0.6, 9.4]  |     | 3.7 (0.6) [2.0, 7.3]  |     |
| ≥48 h                                                                 | 4.2 (0.8) [1.1, 11.5] |     | 4.3 (0.9) [1.6, 8.8]  |     |
| Percentage of BGC outside central band of 3 to 4 mmol/L in first 48 h | 53 (23)               | 480 | 51 (25)               | 107 |
| CGM                                                                   | 377 (79%)             | 480 | 75 (70%)              | 72  |
| SGC—mmol/L [range]                                                    |                       |     |                       |     |
| <12 h                                                                 | 3.6 (0.8) [0.0, 9.9]  | 340 | 3.7 (0.9) [0.9, 9.6]  | 67  |
| 12 to <24 h                                                           | 3.7 (0.7) [1.4, 9.8]  | 357 | 3.7 (0.7) [1.8, 8.8]  | 72  |
| 24 to <48 h                                                           | 3.9 (0.8) [0.9, 13.2] | 337 | 3.8 (0.7) [1.0, 9.1]  | 66  |
| ≥48 h                                                                 | 4.3 (0.9) [1.1, 13.9] | 195 | 4.4 (0.9) [1.1, 9.0]  | 36  |
| Percentage of SGC outside central band of 3 to 4 mmol/L in first 48 h | 49 (26)               | 372 | 52 (28)               | 74  |
| Feeding in the first week                                             |                       | 480 |                       | 107 |
| No enteral feeds                                                      | 8 (2%)                |     | 1 (1%)                |     |
| Breast milk only                                                      | 165 (34%)             |     | 42 (39%)              |     |
| Formula milk only                                                     | 31 (6%)               |     | 3 (3%)                |     |
| Breast and formula milk                                               | 276 (58%)             |     | 61 (57%)              |     |
| Intravenous dextrose <48 h                                            | 91 (19%)              |     | 21 (20%)              | 107 |

Data are mean (standard deviation) or number (percent), unless otherwise indicated. Abbreviations: BGC, blood glucose concentration; BMI, body mass index; CHYLD, Children with Hypoglycaemia and their Later Development; CGM, continuous glucose monitoring; IDM, infant of diabetic mother; SGC, sensor glucose concentration; NICU, neonatal intensive care unit; NZ, New Zealand. To convert BGC from mmol/L (SI units) to mg/dL, divide by 0.0555. <sup>a</sup>Hypoglycemia defined as ≥1 hypoglycemic event, representing the sum of non-concurrent hypoglycemic and interstitial episodes more than 20 minutes apart; a hypoglycemic episode is defined as ≥1 consecutive BGC <2.6 mmol/L (<47 mg/dL) and an interstitial episode as SGC <2.6 mmol/L (<47 mg/dL) for ≥10 minutes. <sup>b</sup>Most deprived is defined as New Zealand Deprivation Index 8-10. <sup>c</sup>Inadequate family resources is defined as a total score <32 on the New Zealand Family Resource Scale, questions 1, 2, 5, 6, 7, 9, 11, 12 (maximum score 40; scores of 32 or above indicate that resources are usually adequate for all items). \*  $P < 0.05$  for comparison between participants and non-participants.

**eTable 3. Neonatal Hypoglycaemic Episodes vs. No Hypoglycemic Episodes and Primary and Critical Secondary Outcomes at Mid-Childhood**

|                                                                                                                                           | Hypoglycemic episodes | N   | No hypoglycemic episodes | N   | Adjusted RR or MD or CR (95% CI) | P    |
|-------------------------------------------------------------------------------------------------------------------------------------------|-----------------------|-----|--------------------------|-----|----------------------------------|------|
| Low educational achievement (primary outcome) <sup>b</sup>                                                                                | 123 (46%)             | 268 | 97 (49%)                 | 200 | 0.94 (0.78, 1.12)                | 0.47 |
| Achievement z-score in Reading Comprehension/Pānui <sup>c</sup>                                                                           | -0.23 (1.13)          | 268 | -0.29 (1.21)             | 200 | 0.06 (-0.15, 0.26)               | 0.60 |
| Achievement z-score in Mathematics/Pāngarau <sup>c</sup>                                                                                  | -0.13 (0.85)          | 267 | -0.20 (0.78)             | 199 | 0.08 (-0.06, 0.23)               | 0.27 |
| Received additional learning support or older than expected for year level or low educational achievement <sup>d</sup>                    | 189 (69%)             | 274 | 143 (70%)                | 203 | 1.00 (0.89, 1.12)                | 0.97 |
| One-touch Stockings of Cambridge (Planning/Working Memory) Number of problems solved on first choice                                      | 8 (5, 10)             | 271 | 8 (5, 10)                | 201 | 1.01 (0.95, 1.08)                | 0.72 |
| Median latency to first choice—ms                                                                                                         | 12653 (6600)          | 271 | 13259 (7482)             | 201 | -567 (-1850, 716)                | 0.39 |
| Movement Assessment Battery for Children fine motor scale score <15 <sup>th</sup> percentile                                              | 115 (42%)             | 271 | 90 (45%)                 | 199 | 0.96 (0.79, 1.15)                | 0.63 |
| Beery-Buktenica visual-motor integration score <85                                                                                        | 98 (36%)              | 271 | 82 (41%)                 | 201 | 0.91 (0.72, 1.14)                | 0.40 |
| Proportion of children with borderline or abnormal Total Difficulties Score on parent or teacher Strengths and Difficulties Questionnaire | 110 (41%)             | 266 | 80 (40%)                 | 202 | 1.09 (0.87, 1.35)                | 0.45 |
| Autism Spectrum Quotient Total Score                                                                                                      | 54.5 (17.6)           | 215 | 54.2 (15.5)              | 149 | 0.9 (-2.5, 4.3)                  | 0.62 |

Data are number (percent), mean (standard deviation) or median (interquartile range). <sup>a</sup>Hypoglycemic episode defined as  $\geq 1$  consecutive blood glucose concentration  $< 2.6$  mmol/L ( $< 47$  mg/dL). <sup>b</sup>Low educational achievement is defined as an e-asTTle score below or well below the normative curriculum level in Reading Comprehension/Pānui or Mathematics/Pāngarau. <sup>c</sup>Achievement z-score is the standardized e-asTTle score for current term of schooling. <sup>d</sup>Older than expected for year level was defined as the child being one or more years older than 95% of children in their year level on 1 July of the year in which they were assessed, i.e., being 9 years or older in Year 4, 10 years or older in Year 5, or 11 years or older in Year 6. Adjusted for potential confounding by sex, primary risk factor for hypoglycemia and New Zealand Deprivation Index at study entry. See manuscript text for statistical methods.

**eTable 4. Undetected vs. Detected Neonatal Hypoglycemia And primary and Critical Secondary Outcomes at Mid-Childhood<sup>a</sup>**

|                                                                                                                                           | Hypoglycemia |     |              |    |              |     | Undetected vs. none              |      | Detected vs. none                |      |
|-------------------------------------------------------------------------------------------------------------------------------------------|--------------|-----|--------------|----|--------------|-----|----------------------------------|------|----------------------------------|------|
|                                                                                                                                           | None         | N   | Undetected   | N  | Detected     | N   | Adjusted RR or MD or CR (95% CI) | P    | Adjusted RR or MD or CR (95% CI) | P    |
| Low educational achievement (primary outcome) <sup>b</sup>                                                                                | 59 (48%)     | 124 | 15 (54%)     | 28 | 123 (46%)    | 268 | 1.04 (0.69, 1.57)                | 0.97 | 0.93 (0.73, 1.19)                | 0.75 |
| Achievement z-score in Reading Comprehension/Pānui <sup>c</sup>                                                                           | -0.37 (1.33) | 124 | -0.06 (0.90) | 28 | -0.23 (1.13) | 286 | 0.34 (-0.18, 0.86)               | 0.26 | 0.14 (-0.13, 0.42)               | 0.42 |
| Achievement z-score in Mathematics/Pāngarau <sup>c</sup>                                                                                  | -0.22 (0.80) | 124 | -0.18 (0.78) | 28 | -0.13 (0.85) | 267 | 0.05 (-0.32, 0.42)               | 0.93 | 0.10 (-0.10, 0.29)               | 0.44 |
| Received additional learning support or older than expected for year level or low educational achievement <sup>d</sup>                    | 84 (67%)     | 125 | 23 (79%)     | 29 | 189 (69%)    | 274 | 1.05 (0.82, 1.35)                | 0.86 | 1.03 (0.87, 1.22)                | 0.89 |
| One-touch Stockings of Cambridge (Planning/Working Memory) Number of problems solved on first choice                                      | 8 (5, 10)    | 125 | 8 (5, 9)     | 28 | 8 (5, 10)    | 271 | 0.95 (0.80, 1.13)                | 0.76 | 1.02 (0.93, 1.11)                | 0.88 |
| Median latency to first choice—ms                                                                                                         | 13862 (8023) | 125 | 11127 (6170) | 28 | 12653 (6600) | 271 | -2636 (-5878, 607)               | 0.13 | -1097 (-2790, 595)               | 0.27 |
| Movement Assessment Battery for Children fine motor scale score <15 <sup>th</sup> percentile                                              | 53 (43%)     | 123 | 15 (54%)     | 28 | 115 (42%)    | 271 | 1.24 (0.82, 1.86)                | 0.41 | 1.02 (0.79, 1.31)                | 0.99 |
| Beery-Buktenica visual-motor integration score <85                                                                                        | 52 (42%)     | 124 | 11 (39%)     | 28 | 98 (36%)     | 271 | 0.87 (0.50, 1.54)                | 0.83 | 0.88 (0.66, 1.19)                | 0.56 |
| Proportion of children with borderline or abnormal Total Difficulties Score on parent or teacher Strengths and Difficulties Questionnaire | 50 (40%)     | 126 | 12 (41%)     | 29 | 110 (41%)    | 266 | 1.11 (0.75, 1.64)                | 0.79 | 0.95 (0.79, 1.15)                | 0.81 |
| Autism Spectrum Quotient Total Score                                                                                                      | 54.4 (16.0)  | 94  | 52.3 (13.5)  | 21 | 54.5 (17.6)  | 215 | -2.6 (-11.3, 6.0)                | 0.74 | 0.4 (-4.1, 4.8)                  | 0.98 |

Data are number (percent), mean (standard deviation) or median (interquartile range). <sup>a</sup>Detected hypoglycemia defined as  $\geq 1$  consecutive blood glucose concentration  $< 2.6$  mmol/L ( $< 47$  mg/dL); undetected hypoglycaemia defined as  $\geq 1$  interstitial episode, representing sensor glucose concentration  $< 2.6$  mmol/L ( $< 47$  mg/dL) for  $\geq 10$  minutes, without hypoglycemia by blood glucose. <sup>b</sup>Low educational achievement is defined as an e-asTTle score below or well below the normative curriculum level in Reading Comprehension/Pānui or Mathematics/Pāngarau. <sup>c</sup>Achievement z-score is the standardized e-asTTle score for current term of schooling. <sup>d</sup>Older than expected for year level was defined as the child being one or more years older than 95% of children in their year level on 1 July of the year in which they were assessed, i.e., being 9 years or older in Year 4, 10 years or older in Year 5, or 11 years or older in Year 6. Adjusted for potential confounding by sex, primary risk factor for hypoglycemia and New Zealand Deprivation Index at study entry. See manuscript text for statistical methods.

**eTable 5. Different Degrees of Neonatal Hypoglycemia and Primary and Critical Secondary Outcomes in Mid-Childhood<sup>a</sup>**

|                                                                                                                                           | Hypoglycemic events |     |              |     |              |     | Mild vs. none                    |      | Severe vs. none                  |      |
|-------------------------------------------------------------------------------------------------------------------------------------------|---------------------|-----|--------------|-----|--------------|-----|----------------------------------|------|----------------------------------|------|
|                                                                                                                                           | None                | N   | Mild         | N   | Severe       | N   | Adjusted RR or MD or CR (95% CI) | P    | Adjusted RR or MD or CR (95% CI) | P    |
| Low educational achievement (primary outcome) <sup>b</sup>                                                                                | 82 (48%)            | 172 | 75 (44%)     | 172 | 63 (51%)     | 124 | 0.93 (0.73, 1.20)                | 0.77 | 0.97 (0.75, 1.25)                | 0.95 |
| Achievement z-score in Reading Comprehension/Pānui <sup>c</sup>                                                                           | -0.32 (1.26)        | 172 | -0.12 (1.14) | 172 | -0.33 (1.07) | 124 | 0.19 (-0.07, 0.46)               | 0.19 | 0.02 (-0.27, 0.31)               | 0.99 |
| Achievement z-score in Mathematics/Pāngarau <sup>c</sup>                                                                                  | -0.21 (0.78)        | 171 | -0.11 (0.82) | 171 | -0.16 (0.87) | 124 | 0.09 (-0.10, 0.28)               | 0.47 | 0.08 (-0.13, 0.29)               | 0.60 |
| Received additional learning support or older than expected for year level or low educational achievement <sup>d</sup>                    | 120 (69%)           | 174 | 127 (72%)    | 176 | 85 (67%)     | 127 | 1.03 (0.89, 1.20)                | 0.85 | 0.97 (0.81, 1.16)                | 0.91 |
| One-touch Stockings of Cambridge (Planning/Working Memory) Number of problems solved on first choice                                      | 8 (5, 10)           | 173 | 8 (6, 10)    | 174 | 7 (5, 10)    | 125 | 1.02 (0.93, 1.11)                | 0.86 | 0.97 (0.88, 1.07)                | 0.69 |
| Median latency to first choice—ms                                                                                                         | 13604 (7632)        | 173 | 12771 (6324) | 174 | 12147 (6900) | 125 | -844 (-2502, 814)                | 0.43 | -1365 (-3179, 449)               | 0.17 |
| Movement Assessment Battery for Children fine motor scale score <15 <sup>th</sup> percentile                                              | 75 (44%)            | 171 | 70 (40%)     | 174 | 60 (48%)     | 125 | 0.96 (0.75, 1.24)                | 0.92 | 1.05 (0.82, 1.35)                | 0.85 |
| Beery-Buktenica visual-motor integration score <85                                                                                        | 71 (41%)            | 173 | 57 (33%)     | 174 | 52 (42%)     | 125 | 0.81 (0.59, 1.10)                | 0.22 | 0.98 (0.72, 1.34)                | 0.99 |
| Proportion of children with borderline or abnormal Total Difficulties Score on parent or teacher Strengths and Difficulties Questionnaire | 68 (39%)            | 173 | 65 (38%)     | 171 | 57 (46%)     | 124 | 1.05 (0.78, 1.42)                | 0.90 | 1.14 (0.85, 1.54)                | 0.53 |
| Autism Spectrum Quotient Total Score                                                                                                      | 54.5 (15.9)         | 128 | 53.2 (17.1)  | 133 | 55.8 (17.5)  | 103 | -0.6 (-5.0, 3.8)                 | 0.94 | 1.2 (-3.5, 5.9)                  | 0.79 |

Data are number (percent), mean (standard deviation) or median (interquartile range). <sup>a</sup>Hypoglycemic event defined as the sum of non-concurrent hypoglycemic and interstitial episodes more than 20 minutes apart; a hypoglycemic episode is defined as  $\geq 1$  consecutive blood glucose concentration  $< 2.6$  mmol/L ( $< 47$  mg/dL) and an interstitial episode as sensor glucose concentration  $< 2.6$  mmol/L ( $< 47$  mg/dL) for  $\geq 10$  minutes; a severe event represents a blood or sensor glucose concentration  $< 2.0$  mmol/L; <sup>b</sup>Low educational achievement is defined as an e-asTTle score below or well below the normative curriculum level in Reading Comprehension/Pānui or Mathematics/Pāngarau. <sup>c</sup>Achievement z-score is the standardized e-asTTle score for current term of schooling. <sup>d</sup>Older than expected for year level was defined as the child being one or more years older than 95% of children in their year level on 1 July of the year in which they were assessed, i.e., being 9 years or older in Year 4, 10 years or older in Year 5, or 11 years or older in Year 6. Adjusted for potential confounding by sex, primary risk factor for hypoglycemia and New Zealand Deprivation Index at study entry. See manuscript text for statistical methods.

**eTable 6A. Sensitivity Analysis of Primary and Critical Secondary Outcomes in Mid-Childhood, Excluding Children Who Experienced a Postnatal Neurological Insult**

|                                                                                                                                           | Hypoglycemic events | N   | No hypoglycemic events | N   | Adjusted RR or MD or CR<br>(95% CI) | P    |
|-------------------------------------------------------------------------------------------------------------------------------------------|---------------------|-----|------------------------|-----|-------------------------------------|------|
| Low educational achievement (primary outcome) <sup>b</sup>                                                                                | 135 (46%)           | 292 | 81 (48%)               | 168 | 0.94 (0.78, 1.14)                   | 0.53 |
| Achievement z-score in Reading Comprehension/Pānui <sup>c</sup>                                                                           | -0.20 (1.11)        | 292 | -0.33 (1.26)           | 168 | 0.10 (-0.05, 0.25)                  | 0.21 |
| Achievement z-score in Mathematics/Pāngarau <sup>c</sup>                                                                                  | -0.13 (0.84)        | 291 | -0.22 (0.79)           | 167 | 0.21 (-0.05, 0.25)                  | 0.21 |
| Received additional learning support or older than expected for year level or low educational achievement <sup>d</sup>                    | 208 (70%)           | 299 | 116 (68%)              | 170 | 1.01 (0.89, 1.15)                   | 0.86 |
| One-touch Stockings of Cambridge (Planning/Working Memory)<br>Number of problems solved on first choice                                   | 8 (5, 10)           | 295 | 8 (5, 10)              | 169 | 1.00 (0.93, 1.07)                   | 0.99 |
| Median latency to first choice—ms                                                                                                         | 12569 (6559)        | 195 | 13756 (7647)           | 169 | -1168 (-2488, 151)                  | 0.08 |
| Movement Assessment Battery for Children fine motor scale score <15 <sup>th</sup> percentile                                              | 127 (43%)           | 295 | 73 (44%)               | 167 | 1.00 (0.82, 1.21)                   | 0.97 |
| Beery-Buktenica visual-motor integration score <85                                                                                        | 107 (36%)           | 295 | 69 (41%)               | 169 | -0.88 (0.70, 1.12)                  | 0.32 |
| Proportion of children with borderline or abnormal Total Difficulties Score on parent or teacher Strengths and Difficulties Questionnaire | 119 (41%)           | 291 | 65 (38%)               | 169 | 1.11 (0.88, 1.40)                   | 0.38 |
| Autism Spectrum Quotient Total Score                                                                                                      | 54.2 (17.0)         | 233 | 54.3 (15.7)            | 125 | 0.2 (-3.2, 3.7)                     | 0.90 |

Data are number (percent), mean (standard deviation) or median (interquartile range). <sup>a</sup>Hypoglycemic event defined as the sum of non-concurrent hypoglycemic and interstitial episodes more than 20 minutes apart; a hypoglycemic episode is defined as  $\geq 1$  consecutive blood glucose concentration  $< 2.6$  mmol/L ( $< 47$  mg/dL) and an interstitial episode as sensor glucose concentration  $< 2.6$  mmol/L ( $< 47$  mg/dL) for  $\geq 10$  minutes; a severe event represents a blood or sensor glucose concentration  $< 2.0$  mmol/L; <sup>b</sup>Low educational achievement is defined as an e-asTTle score below or well below the normative curriculum level in Reading Comprehension/Pānui or Mathematics/Pāngarau. <sup>c</sup>Achievement z-score is the standardized e-asTTle score for current term of schooling. <sup>d</sup>Older than expected for year level was defined as the child being one or more years older than 95% of children in their year level on 1 July of the year in which they were assessed, i.e., being 9 years or older in Year 4, 10 years or older in Year 5, or 11 years or older in Year 6. Adjusted for potential confounding by sex, primary risk factor for hypoglycemia and New Zealand Deprivation Index at study entry. See manuscript text for statistical methods.

**eTable 6B. Sensitivity Analysis of Primary and Critical Secondary Outcomes in Mid-Childhood, Excluding Children Who Were Educated Outside of New Zealand**

|                                                                                                                                           | Hypoglycemic events | N   | No hypoglycemic events | N   | Adjusted RR or MD or CR<br>(95% CI) | P    |
|-------------------------------------------------------------------------------------------------------------------------------------------|---------------------|-----|------------------------|-----|-------------------------------------|------|
| Low educational achievement (primary outcome) <sup>b</sup>                                                                                | 138 (47%)           | 296 | 82 (48%)               | 172 | 0.95 (0.78, 1.15)                   | 0.60 |
| Achievement z-score in Reading Comprehension/Pānui <sup>c</sup>                                                                           | -0.21 (1.11)        | 296 | -0.32 (1.26)           | 172 | 0.12 (-0.09, 0.33)                  | 0.26 |
| Achievement z-score in Mathematics/Pāngarau <sup>c</sup>                                                                                  | -0.13 (0.84)        | 295 | -0.21 (0.78)           | 171 | 0.09 (-0.06, 0.24)                  | 0.26 |
| Received additional learning support or older than expected for year level or low educational achievement <sup>d</sup>                    | 208 (70%)           | 296 | 119 (69%)              | 172 | 1.00 (0.89, 1.14)                   | 0.95 |
| One-touch Stockings of Cambridge (Planning/Working Memory)<br>Number of problems solved on first choice                                   | 8 (5, 10)           | 295 | 8 (5, 10)              | 172 | 1.00 (0.93, 1.07)                   | 0.99 |
| Median latency to first choice—ms                                                                                                         | 12540 (6532)        | 295 | 13673 (7600)           | 172 | -1099 (664)                         | 0.10 |
| Movement Assessment Battery for Children fine motor scale score <15 <sup>th</sup> percentile                                              | 127 (43%)           | 295 | 74 (43%)               | 170 | 1.00 (0.82, 1.22)                   | 0.99 |
| Beery-Buktenica visual-motor integration score <85                                                                                        | 107 (36%)           | 295 | 71 (41%)               | 170 | 0.88 (0.70, 1.11)                   | 0.28 |
| Proportion of children with borderline or abnormal Total Difficulties Score on parent or teacher Strengths and Difficulties Questionnaire | 118 (41%)           | 288 | 67 (40%)               | 169 | 1.07 (0.85, 1.34)                   | 0.56 |
| Autism Spectrum Quotient Total Score                                                                                                      | 54.6 (17.2)         | 231 | 54.5 (15.9)            | 127 | 0.3 (-3.2, 3.8)                     | 0.88 |

Data are number (percent), mean (standard deviation) or median (interquartile range). <sup>a</sup>Hypoglycemic event defined as the sum of non-concurrent hypoglycemic and interstitial episodes more than 20 minutes apart; a hypoglycemic episode is defined as  $\geq 1$  consecutive blood glucose concentration  $< 2.6$  mmol/L ( $< 47$  mg/dL) and an interstitial episode as sensor glucose concentration  $< 2.6$  mmol/L ( $< 47$  mg/dL) for  $\geq 10$  minutes; a severe event represents a blood or sensor glucose concentration  $< 2.0$  mmol/L; <sup>b</sup>Low educational achievement is defined as an e-asTTle score below or well below the normative curriculum level in Reading Comprehension/Pānui or Mathematics/Pāngarau. <sup>c</sup>Achievement z-score is the standardized e-asTTle score for current term of schooling. <sup>d</sup>Older than expected for year level was defined as the child being one or more years older than 95% of children in their year level on 1 July of the year in which they were assessed, i.e., being 9 years or older in Year 4, 10 years or older in Year 5, or 11 years or older in Year 6. Adjusted for potential confounding by sex, primary risk factor for hypoglycemia and New Zealand Deprivation Index at study entry. See manuscript text for statistical methods.

**eTable 6C. Sensitivity Analysis of Primary and Critical Secondary Outcomes in Mid-Childhood, Excluding Children Who Were Classified as Normoglycemic But Did Not Have Neonatal Continuous Glucose Monitoring to Potentially Detect Low Sensor Glucose Concentrations**

|                                                                                                                                           | Hypoglycemic events | N   | No hypoglycemic events | N    | Adjusted RR or MD or CR<br>(95% CI) | P    |
|-------------------------------------------------------------------------------------------------------------------------------------------|---------------------|-----|------------------------|------|-------------------------------------|------|
| Low educational achievement (primary outcome) <sup>b</sup>                                                                                | 138 (47%)           | 296 | 59 (48%)               | 124  | 0.94 (0.76, 1.17)                   | 0.60 |
| Achievement z-score in Reading Comprehension/Pānui <sup>c</sup>                                                                           | -0.21 (1.11)        | 296 | -0.37 (1.33)           | 124  | 0.16 (-0.07, 0.40)                  | 0.18 |
| Achievement z-score in Mathematics/Pāngarau <sup>c</sup>                                                                                  | -0.13 (0.84)        | 295 | -0.22 (0.80)           | 123  | 0.09 (-0.08, 0.26)                  | 0.28 |
| Received additional learning support or older than expected for year level or low educational achievement <sup>d</sup>                    | 212 (70%)           | 303 | 84 (67%)               | 125  | 1.03 (0.89, 1.19)                   | 0.71 |
| One-touch Stockings of Cambridge (Planning/Working Memory)<br>Number of problems solved on first choice                                   | 8 (5, 10)           | 299 | 8 (5, 10)              | 125  | 1.01 (0.95, 1.09)                   | 0.80 |
| Median latency to first choice—ms                                                                                                         | 12511 (6566)        | 299 | 13862 (8023)           | 1215 | -1269 (-2734, 196)                  | 0.09 |
| Movement Assessment Battery for Children fine motor scale score <15 <sup>th</sup> percentile                                              | 130 (43%)           | 299 | 53 (43%)               | 123  | 1.04 (0.83, 1.29)                   | 0.75 |
| Beery-Buktenica visual-motor integration score <85                                                                                        | 109 (36%)           | 299 | 52 (42%)               | 124  | 0.88 (0.68, 1.14)                   | 0.34 |
| Proportion of children with borderline or abnormal Total Difficulties Score on parent or teacher Strengths and Difficulties Questionnaire | 173 (59%)           | 295 | 76 (60%)               | 126  | 1.10 (0.86, 1.41)                   | 0.46 |
| Autism Spectrum Quotient Total Score                                                                                                      | 54.3 (17.3)         | 236 | 54.4 (16.0)            | 94   | 0.1 (-3.7, 4.0)                     | 0.95 |

Data are number (percent), mean (standard deviation) or median (interquartile range). <sup>a</sup>Hypoglycemic event defined as the sum of non-concurrent hypoglycemic and interstitial episodes more than 20 minutes apart; a hypoglycemic episode is defined as  $\geq 1$  consecutive blood glucose concentration  $< 2.6$  mmol/L ( $< 47$  mg/dL) and an interstitial episode as sensor glucose concentration  $< 2.6$  mmol/L ( $< 47$  mg/dL) for  $\geq 10$  minutes; a severe event represents a blood or sensor glucose concentration  $< 2.0$  mmol/L; <sup>b</sup>Low educational achievement is defined as an e-asTTle score below or well below the normative curriculum level in Reading Comprehension/Pānui or Mathematics/Pāngarau. <sup>c</sup>Achievement z-score is the standardized e-asTTle score for current term of schooling. <sup>d</sup>Older than expected for year level was defined as the child being one or more years older than 95% of children in their year level on 1 July of the year in which they were assessed, i.e., being 9 years or older in Year 4, 10 years or older in Year 5, or 11 years or older in Year 6. Adjusted for potential confounding by sex, primary risk factor for hypoglycemia and New Zealand Deprivation Index at study entry. See manuscript text for statistical methods.

**eTable 6D. Sensitivity Analysis of Primary And Critical Secondary Outcomes in Mid-Childhood, Excluding Children Who Were Born at <35 Weeks' Gestation**

|                                                                                                                                           | Hypoglycemic events | N   | No hypoglycemic events | N   | Adjusted RR or MD or CR<br>(95% CI) | P    |
|-------------------------------------------------------------------------------------------------------------------------------------------|---------------------|-----|------------------------|-----|-------------------------------------|------|
| Low educational achievement (primary outcome) <sup>b</sup>                                                                                | 126 (47%)           | 268 | 77 (48%)               | 162 | 0.97 (0.80, 1.18)                   | 0.76 |
| Achievement z-score in Reading Comprehension/Pānui <sup>c</sup>                                                                           | -0.18 (1.14)        | 268 | -0.32 (1.26)           | 162 | 0.1 (-0.1, 0.4)                     | 0.21 |
| Achievement z-score in Mathematics/Pāngarau <sup>c</sup>                                                                                  | -0.12 (0.83)        | 267 | -0.19 (0.75)           | 162 | 0.1 (-0.1, 0.2)                     | 0.29 |
| Received additional learning support or older than expected for year level or low educational achievement <sup>d</sup>                    | 197 (72%)           | 275 | 114 (70%)              | 164 | 1.02 (0.90, 1.16)                   | 0.73 |
| One-touch Stockings of Cambridge (Planning/Working Memory)<br>Number of problems solved on first choice                                   | 8 (5, 10)           | 271 | 8 (5, 10)              | 163 | 1.02 (0.95, 1.09)                   | 0.61 |
| Median latency to first choice—ms                                                                                                         | 12591 (6401)        | 271 | 13271 (7370)           | 163 | -664 (-1976, 648)                   | 0.32 |
| Movement Assessment Battery for Children fine motor scale score <15 <sup>th</sup> percentile                                              | 116 (43%)           | 271 | 68 (42%)               | 161 | 1.03 (0.84, 1.27)                   | 0.77 |
| Beery-Buktenica visual-motor integration score <85                                                                                        | 97 (36%)            | 271 | 66 (40%)               | 163 | 0.88 (0.69, 1.12)                   | 0.30 |
| Proportion of children with borderline or abnormal Total Difficulties Score on parent or teacher Strengths and Difficulties Questionnaire | 159 (59%)           | 269 | 96 (59%)               | 163 | 1.03 (0.82, 1.30)                   | 0.77 |
| Autism Spectrum Quotient Total Score                                                                                                      | 54.1 (17.2)         | 212 | 54.4 (15.8)            | 121 | 0.2 (-3.4, 3.8)                     | 0.91 |

Data are number (percent), mean (standard deviation) or median (interquartile range). <sup>a</sup>Hypoglycemic event defined as the sum of non-concurrent hypoglycemic and interstitial episodes more than 20 minutes apart; a hypoglycemic episode is defined as  $\geq 1$  consecutive blood glucose concentration  $< 2.6$  mmol/L ( $< 47$  mg/dL) and an interstitial episode as sensor glucose concentration  $< 2.6$  mmol/L ( $< 47$  mg/dL) for  $\geq 10$  minutes; a severe event represents a blood or sensor glucose concentration  $< 2.0$  mmol/L; <sup>b</sup>Low educational achievement is defined as an e-asTTle score below or well below the normative curriculum level in Reading Comprehension/Pānui or Mathematics/Pāngarau. <sup>c</sup>Achievement z-score is the standardized e-asTTle score for current term of schooling. <sup>d</sup>Older than expected for year level was defined as the child being one or more years older than 95% of children in their year level on 1 July of the year in which they were assessed, i.e., being 9 years or older in Year 4, 10 years or older in Year 5, or 11 years or older in Year 6. Adjusted for potential confounding by sex, primary risk factor for hypoglycemia and New Zealand Deprivation Index at study entry. See manuscript text for statistical methods.

**eTable 7. Neonatal Hypoglycemia and Primary Outcome, Executive Function and Visual-Motor Integration at Mid-Childhood, Adjusted for Neurocognitive Function at 4.5 Years (Exploratory Post Hoc Analysis)**

|                                                                 | Hypoglycemia <sup>a</sup> | N   | No hypoglycemia | N   | Adjusted RR or MD or CR (95% CI) | P    |
|-----------------------------------------------------------------|---------------------------|-----|-----------------|-----|----------------------------------|------|
| Low educational achievement (primary outcome) <sup>b</sup>      | 121 (45%)                 | 269 | 68 (48%)        | 143 | 0.99 (0.94, 1.06)                | 0.86 |
| <i>Attention Switching Task<sup>c</sup></i>                     |                           |     |                 |     |                                  |      |
| Switching median response latency—ms                            | 840 (182)                 | 268 | 836 (168)       | 140 | 6 (-29, 42)                      | 0.73 |
| Congruent median response latency—ms                            | 721 (127)                 | 268 | 715 (119)       | 140 | 7 (-19, 32)                      | 0.61 |
| <i>One-touch Stockings of Cambridge<sup>c</sup></i>             |                           |     |                 |     |                                  |      |
| Number of problems solved on first choice                       | 8 (6, 10)                 | 269 | 8 (5, 10)       | 140 | 1.02 (0.95, 1.10)                | 0.61 |
| Median latency to first choice—ms                               | 12641 (6622)              | 269 | 13563 (7598)    | 140 | -946 (-2368, 475)                | 0.19 |
| <i>Spatial Working Memory<sup>c</sup></i>                       |                           |     |                 |     |                                  |      |
| Between search errors                                           | 19 (12, 22)               | 269 | 19 (12, 22)     | 140 | 1.06 (0.98, 1.15)                | 0.11 |
| Strategy score                                                  | 9.0 (1.5)                 | 269 | 9.1 (1.7)       | 140 | -0.1 (-0.4, 0.2)                 | 0.63 |
| <i>Paired Associate Learning<sup>c</sup></i>                    |                           |     |                 |     |                                  |      |
| First attempt memory score                                      | 13.4 (3.7)                | 139 | 13.7 (3.9)      | 139 | -0.1 (-0.9, 0.6)                 | 0.76 |
| Total errors (adjusted)                                         | 9 (5, 14)                 | 139 | 8 (4, 14)       | 139 | 0.99 (0.94, 1.06)                | 0.84 |
| <i>Stop Signal Task<sup>c</sup></i>                             |                           |     |                 |     |                                  |      |
| Stop signal reaction time—ms                                    | 339 (78)                  | 269 | 333 (86)        | 139 | 7 (-9, 23)                       | 0.37 |
| Failed stop reaction time less than go reaction time            | 260 (98%)                 | 265 | 136 (98%)       | 139 | 1.00 (0.61, 1.63)                | 0.99 |
| Mean failed stop reaction time increases                        | 240 (91%)                 | 265 | 122 (88%)       | 139 | 1.01 (0.94, 1.10)                | 0.71 |
| Beery-Buktenica visual-motor integration score <85 <sup>d</sup> | 96 (35%)                  | 271 | 59 (41%)        | 144 | 0.98 (0.91, 1.05)                | 0.50 |

Data are number (percent), mean (standard deviation) or median (interquartile range). <sup>a</sup>Hypoglycemia defined as  $\geq 1$  hypoglycemic event, representing the sum of non-concurrent hypoglycemic and interstitial episodes more than 20 minutes apart; a hypoglycemic episode is defined as  $\geq 1$  consecutive blood glucose concentration  $< 2.6$  mmol/L ( $< 47$  mg/dL) and an interstitial episode as sensor glucose concentration  $< 2.6$  mmol/L ( $< 47$  mg/dL) for  $\geq 10$  minutes. <sup>b</sup>Low educational achievement is defined as an e-asTTle score below or well below the normative curriculum level in Reading Comprehension/Pānui or Mathematics/Pāngarau; adjusted for full-scale intelligence quotient at 4.5 years. <sup>c</sup>Adjusted for executive function score at 4.5 years. <sup>d</sup>Adjusted for visual-motor integration score at 4.5 years.

<sup>a</sup>Hypoglycemic episode defined as  $\geq 1$  consecutive blood glucose concentration  $< 2.6$  mmol/L ( $< 47$  mg/dL). <sup>b</sup>Low educational achievement is defined as an e-asTTle score below or well below the normative curriculum level in Reading Comprehension/Pānui or Mathematics/Pāngarau. <sup>c</sup>Achievement z-score is the standardized e-asTTle score for current term of schooling. <sup>d</sup>Older than expected for year level was defined as the child being one or more years older than 95% of children in their year level on 1 July of the year in which they were assessed, i.e., being 9 years or older in Year 4, 10 years or older in Year 5, or 11 years or older in Year 6. Adjusted for potential confounding by sex, primary risk factor for hypoglycemia and New Zealand Deprivation Index at study entry. See manuscript text for statistical methods.

## eReferences

1. Green R, Till C, Al-Hakeem H, Cribbie R, Téllez-Rojo MM, Osorio E, et al. Assessment of neuropsychological performance in Mexico City youth using the Cambridge Neuropsychological Test Automated Battery (CANTAB). *J Clin Exp Neuropsychol*. 2019;41(3):246-56.
2. Yu TY, Jacobs RJ, Anstice NS, Paudel N, Harding JE, Thompson B, et al. Global motion perception in 2-year-old children: a method for psychophysical assessment and relationships with clinical measures of visual function. *Invest Ophthalmol Vis Sci*. 2013;54(13):8408-19.
3. Hayes L. Problem behaviours in early primary school children: Australian normative data using the Strengths and Difficulties Questionnaire. *Aust N Z J Psychiatry*. 2007;41(3):231-8.
4. Auyeung B, Baron-Cohen S, Wheelwright S, Allison C. The Autism Spectrum Quotient: Children's Version (AQ-Child). *J Autism Dev Disord*. 2008;38(7):1230-40.
5. McKinlay CJ, Alsweiler J, Anstice N, Burakevych N, Chakraborty A, Chase JG, et al. Association of neonatal glycemia with neurodevelopmental outcomes at 4.5 years. *JAMA Pediatr*. 2017;171(10):1-12.
