# Supplementary material
Source: PubMed Central journal article supplement (PMC8941348)
Supplement: jama-e220992-s004.pdf [file jama-e220992-s004.pdf]

\*Indicates required information. Only first name, last name, and suffix will appear in PubMed.

| <b>*Group Name(s): Children With Hypoglycaemia and Their Later Development (CHYLD) Study Team</b> |                   |                              |                  |                                                |                                          |                                                         |                                                                                            |
|---------------------------------------------------------------------------------------------------|-------------------|------------------------------|------------------|------------------------------------------------|------------------------------------------|---------------------------------------------------------|--------------------------------------------------------------------------------------------|
| <b>*First Name and Middle Initial(s)</b>                                                          | <b>*Last Name</b> | <b>*Suffix (eg, Jr, III)</b> | Academic Degrees | Institution                                    | Location (city, state/province, country) | Role or Contribution, eg, chair, principal investigator | Group (if more than 1 Group listed in the byline and/or Subgroup (eg, Steering Committee)) |
| Heidi                                                                                             | Feldman           |                              | PhD              | Stanford Children's Hospital                   | California, United States of America     | Advisor                                                 | International advisory committee                                                           |
| William                                                                                           | Hay               |                              | MD               | University of Colorado                         | Colorado, United States of America       | Advisor                                                 | International advisory committee                                                           |
| Robert                                                                                            | Hess              |                              | PhD              | Department of Ophthalmology, McGill University | Quebec, Canada                           | Advisor                                                 | International advisory committee                                                           |
| Darrell                                                                                           | Wilson            |                              | MD               | Department of Pediatrics, Stanford U           | California, United States of America     | Advisor                                                 | International advisory committee                                                           |
| Jenny                                                                                             | Rogers            |                              | MHSc             | Liggins Institute, University of Auckland      | Auckland, New Zealand                    | Study Coordinator                                       |                                                                                            |
| Steven                                                                                            | Miller            |                              | MD               | Department of Paediatrics, University          | Toronto, Canada                          | Advisor                                                 |                                                                                            |
| Eleanor                                                                                           | Kennedy           |                              | PhD              | Liggins Institute, University of Auckland      | Auckland, New Zealand                    | Advisor                                                 |                                                                                            |
| Arijit                                                                                            | Chakraborty       |                              | PhD              | School of Optometry and Vision Scier           | Ontario, Canada                          | Advisor                                                 |                                                                                            |
| Jennifer                                                                                          | Knopp             |                              | PhD              | Department of Mechanical Engineeri             | Christchurch, New Zealand                | Advisor                                                 |                                                                                            |
| Tony                                                                                              | Zhou              |                              | PhD              | Department of Mechanical Engineeri             | Christchurch, New Zealand                | Advisor                                                 |                                                                                            |
| Jocelyn                                                                                           | Ledger            |                              |                  | Liggins Institute, University of Auckland      | Auckland, New Zealand                    | Assessor                                                |                                                                                            |
| Stephanie                                                                                         | Macdonald         |                              | BSc              | Liggins Institute, University of Auckland      | Auckland, New Zealand                    | Assessor                                                |                                                                                            |
| Alecia                                                                                            | McNeill           |                              | BSc              | Liggins Institute, University of Auckland      | Auckland, New Zealand                    | Assessor                                                |                                                                                            |
| Coila                                                                                             | Bevan             |                              | BA               | Liggins Institute, University of Auckland      | Auckland, New Zealand                    | Study Coordinator                                       |                                                                                            |
| Nataliia                                                                                          | Burakevych        |                              | PhD              | Liggins Institute, University of Auckland      | Auckland, New Zealand                    | Study Coordinator                                       |                                                                                            |
| Robyn                                                                                             | May               |                              | MPhil            | Liggins Institute, University of Auckland      | Auckland, New Zealand                    | Study Coordinator                                       |                                                                                            |

Supplemental Online Content: Nonauthor Collaborators

\*Indicates required information. Only first name, last name, and suffix will appear in PubMed.

| <b>*First Name and Middle Initial(s)</b> | <b>*Last Name</b> | <b>*Suffix (eg, Jr, III)</b> | Academic Degrees | Institution                               | Location (city, state/province, country) | Role or Contribution, eg, chair, principal investigator | Group (if more than 1 Group listed in the byline) and/or Subgroup (eg, Steering Committee) |
|------------------------------------------|-------------------|------------------------------|------------------|-------------------------------------------|------------------------------------------|---------------------------------------------------------|--------------------------------------------------------------------------------------------|
| Safayet                                  | Hossin            |                              | MSc              | Liggins Institute, University of Auckland | Auckland, New Zealand                    | Data Manager                                            |                                                                                            |
| Grace                                    | McKnight          |                              |                  | Liggins Institute, University of Auckland | Auckland, New Zealand                    | Data Monitor                                            |                                                                                            |
| Rashedul                                 | Hasan             |                              | MSc              | Liggins Institute, University of Auckland | Auckland, New Zealand                    | Data Manager                                            |                                                                                            |
| Jessica                                  | Wilson            |                              | MSc              | Liggins Institute, University of Auckland | Auckland, New Zealand                    | Data Manager                                            |                                                                                            |
